# Supplementary material
Source: PubMed Central journal article supplement (PMC8849575)
Supplement: NIHMS1774519-supplement-1.pdf [file NIHMS1774519-supplement-1.pdf]

**SUPPLEMENTARY TABLE 1.** Bivariate relationships between state same-sex marriage opinion (percent approval) and selected outcomes among U.S. transgender and non-binary youth in grades 7-12 participating in the LGBTQ Teen Study (N=3673)

| <b>Variable</b>                        | <b>Estimate</b> | <b>Std. Error</b> | <b>t</b> | <b>P</b> |
|----------------------------------------|-----------------|-------------------|----------|----------|
| Family connectedness                   | 0.085           | 0.022             | 3.90     | .0003    |
| Teachers know gender minority status   | 0.132           | 0.021             | 4.50     | <.0001   |
| Classmates know gender minority status | 0.069           | 0.014             | 3.97     | .0002    |
| Feel safe at school                    | 0.656           | 0.030             | 2.57     | .0131    |
| Depression                             | -0.070          | 0.004             | -2.58    | .0130    |
| Sexual harassment                      | -0.049          | 0.004             | -2.66    | .0105    |

*Note.* All results are based on bivariate linear regression models for the proportion of state residents who approve of legal same-sex marriage. All variables are standardized to a mean of 0 and standard deviation of 1.

**SUPPLEMENTARY TABLE 2.** Complete-case sensitivity analysis for the association between being restricted from using gender-appropriate restrooms and locker rooms at school and past 12 month sexual assault victimization among U.S. transgender and non-binary youth in grades 7-12 participating in the LGBTQ Teen Study, by sex assigned at birth and gender identity ( $N=2321$ )

|                                     | <b>Adjusted risk ratio for past 12 month sexual<br/>assault victimization (95% CI)</b> |
|-------------------------------------|----------------------------------------------------------------------------------------|
| <i>Assigned female at birth</i>     |                                                                                        |
| Transgender boys ( $n=907$ )        |                                                                                        |
| No restrictions (reference)         | 1.00                                                                                   |
| Restroom/locker room use restricted | 1.20 (0.94, 1.50)                                                                      |
| Non-binary youth ( $n=1204$ )       |                                                                                        |
| No restrictions (reference)         | 1.00                                                                                   |
| Restroom/locker room use restricted | <b>1.41 (1.07, 1.80)</b>                                                               |
| <i>Assigned male at birth</i>       |                                                                                        |
| Transgender girls ( $n=84$ )        |                                                                                        |
| No restrictions (reference)         | 1.00                                                                                   |
| Restroom/locker room use restricted | <b>3.46 (1.56, 5.18)</b>                                                               |
| Non-binary youth ( $n=126$ )        |                                                                                        |
| No restrictions (reference)         | 1.00                                                                                   |
| Restroom/locker room use restricted | 0.74 (0.17, 2.45)                                                                      |

*Note.* All estimates are adjusted for parental educational attainment, alcohol use, family connectedness, teachers' awareness of participant's gender minority status, state same-sex marriage approval rate, presence of gender/sexuality alliance, and teacher LGBTQ attitudes. Within each model, the effect of restroom/locker room restrictions was allowed to vary by sex assigned at birth and gender identity (boy/girl versus non-binary). Bolded values are statistically significant at  $\alpha = 0.05$ .
